1  
2  
3  
4  
5  
6  
7  
8  
9  
10  
11  
12

## Exploring the mechanistic link between corticosterone and insulin-like growth factor-1 in a wild passerine bird

*Zsófia Tóth<sup>1\*</sup>, Jenny Q. Ouyang<sup>2</sup>, Ádám Z. Lendvai<sup>1\*</sup>*

<sup>1</sup>Department of Evolutionary Zoology and Human Biology, University of Debrecen, 4032 Debrecen, Hungary

<sup>2</sup>Department of Biology, University of Nevada, Reno, Nevada 89557, USA

Running head: Mechanistic link between IGF-1 and cort

\*Corresponding authors: [az.lendvai@gmail.com](mailto:az.lendvai@gmail.com) (Á.Z. Lendvai); [hylidae91@gmail.com](mailto:hylidae91@gmail.com) (Z.

Tóth)

## 13 Abstract

14 **Background.** Physiological regulators of life history trade-offs need to be responsive to sudden  
15 changes of resource availability. When homeostasis is challenged by unpredictable stressors,  
16 vertebrates respond through a set of physiological reactions, which can promote organismal  
17 survival. Glucocorticoids have been traditionally recognized as one of the main regulators of the  
18 physiological stress response, but the role of an evolutionarily more conserved pathway, the  
19 hypothalamic-pituitary-somatotropic (HPS) axis producing insulin-like growth factor-1 (IGF-1) has  
20 received much less attention. Although IGF-1 is known to affect several life history traits, little is  
21 known about its role in the physiological stress response and it has never been studied directly in  
22 adult wild animals.

23 **Methods.** In this study, we combined field observations with a controlled experiment to investigate  
24 how circulating levels of IGF-1 change in response to stress and whether this change is due to  
25 concomitant change in glucocorticoids in a free-living songbird, the bearded reedling *Panurus*  
26 *biarmicus*. We used a standard capture-restraint protocol in field observation, in which we took first  
27 and second (stress induced: 15 minutes later) samples. In a follow-up experiment, we used a  
28 minimally invasive oral corticosterone manipulation.

29 **Results.** We showed that corticosterone levels significantly increased while IGF-1 levels  
30 significantly decreased during capture and handling stress. However, change in corticosterone levels  
31 were not related to change in IGF-1 levels. We found that experimentally elevated corticosterone  
32 levels did not affect IGF-1 levels.

33 **Discussion.** Our results are the first to highlight that circulating IGF-1 levels are responsive to stress  
34 independently from glucocorticoids and suggest that the HPS axis is an autonomous physiological  
35 pathway that may play an important role as regulator of life-history decisions.

## 36 Introduction

37 Resource allocation trade-offs are central to the evolution of life-histories. Physiological  
38 mediators of such trade-offs need to monitor resource availability and transmit a signal to relevant  
39 parts of the organism to adjust energy expenditure in face of environmental variation. Possible  
40 candidates of such key life-history regulatory mechanisms must therefore integrate information  
41 from both the external and internal environment and be responsive to changes in resource  
42 availability (Harshman & Zera, 2007). One way to investigate whether a given physiological  
43 mechanism could have such life-history regulatory functions is to assess whether it fulfils these  
44 requirements of information processing, integration and responsiveness. A useful framework to  
45 analyse these questions is when individuals are exposed to stressors. This approach is biologically  
46 and ecologically relevant because in order to successfully reproduce and survive, all organisms  
47 must be able to cope with environmental challenges. An organism can display a stress response  
48 when challenged by unpredictable, noxious changes in the environment, such as the attack of a  
49 predator, an infection, inclement weather, or food shortage (Wingfield et al., 1998; Kitaysky,  
50 Wingfield & Piatt, 1999; Romero, Reed & Wingfield, 2000; Hawlena & Schmitz, 2010). Mounting  
51 an appropriate stress response requires a dramatic reorganization of resource allocation.  
52 Understanding this response provides great insight into life-history decisions and resource  
53 allocation mechanisms.

54 An important regulator of the stress response is the endocrine system, which plays a central  
55 role in regulating the adjustment of morphology, physiology and behaviour to deal with current  
56 conditions (Ricklefs & Wikelski, 2002; Flatt & Heyland, 2011; Wingfield & Boonstra, 2013).  
57 Hormones function as integrators that process information from the environment and orchestrate  
58 multiple processes simultaneously to maximise survival and reproduction under the given  
59 circumstances (Wingfield et al., 1998; Martin et al., 2011). Although some pathways have been  
60 clearly represented in the study of the stress response (e.g. HPA axis – hypothalamic-pituitary-  
61 adrenal axis), other, more evolutionarily conserved pathways are understudied even though they can  
62 play a key role in the evolution of the endocrine system.

63 The HPA cascade begins at the brain that perceives the stressor and launches a series of  
64 downstream hormonal changes. At the endpoint of this axis, the adrenal cortex secrete increased  
65 amounts of glucocorticoids into the bloodstream, which stimulate energy production via  
66 gluconeogenesis. However, this pathway appeared during the evolution of vertebrates, by which  
67 period robust regulation of homeostasis and resource allocation had already evolved (Stoks, 2001;  
68 Baker Michael E., 2003; Bijlsma & Loeschcke, 2005; Pauwels, Stoks & De Meester, 2005;  
69 Hawlena & Schmitz, 2010). A more conserved endocrine pathway is the insulin/insulin-like

70 signalling pathway (the IIS pathway), which is present in all animals and regulates resource  
71 allocation and stress resistance (Broughton et al., 2005; Harshman & Zera, 2007; Dantzer &  
72 Swanson, 2012). In vertebrates, the IIS pathway is integrated into the Hypothalamic-Pituitary-  
73 Somatotropic (HPS) axis. As part of this hormonal cascade, growth hormone (GH) stimulates the  
74 secretion of insulin-like growth factor-1 (IGF-1), primarily from the liver (Roith, Scavo & Butler,  
75 2001).

76 IGF-1 is an evolutionarily highly conserved nutrient sensing hormone that has pleiotropic  
77 effects influencing key life-history traits and major life-history trade-offs among growth,  
78 reproduction and lifespan (Dantzer & Swanson, 2012). IGF-1 is negatively related to lifespan  
79 (Holzenberger et al., 2003; Lewin et al., 2016), but has a positive effect on growth, sexual  
80 maturation and reproduction (Crain et al., 1995; Yakar et al., 1999; Pine et al., 2006; Flatt et al.,  
81 2008; Sparkman, Vleck & Bronikowski, 2009; Lewin et al., 2016, Lodjak, Mägi & Tilgar, 2014,  
82 Swanson & Dantzer, 2014). IGF-1 therefore may mediate the trade-off between longevity and  
83 reproduction because reduced IGF-1 signalling has been shown to increase lifespan and the  
84 expression of genes involved in stress resistance while increased IGF-1 signalling is necessary for  
85 reproduction (Holzenberger et al., 2003; Harshman & Zera, 2007; Dantzer & Swanson, 2012;  
86 Lewin et al., 2016).

87 Although the role of IGF-1 has been established in resource allocation, its role in coping  
88 with stressful situations and the crosstalk between the HPA and the HPS axes remain poorly  
89 understood. It has been shown that IGF-1 levels change under nutritional and handling stress. For  
90 instance, in response to 5 minutes of restraint, circulating IGF-1 levels decreased by 21% within 60  
91 minutes in Yorkshire pigs *Sus crofa domesticus* and remained suppressed for up to 150 minutes  
92 (Farmer et al., 1991). A more recent study in pigs also found that restraint stress caused a drop in  
93 circulating IGF-1 levels and affected other components of the IIS pathway, suggesting that the IGF-  
94 system represents a physiologically relevant biomarker of stress response (Wirthgen et al., 2017).  
95 Similarly, IGF-1 levels significantly decreased due to short-term (15 min) and long term (24 hours)  
96 confinement stress in sunshine bass (hybrid of *Morone saxatilis* and *M. chrysops*), in Atlantic  
97 salmon *Salmo salar* and in rainbow trout *Oncorhynchus mykiss* (Wilkinson et al., 2006; Davis &  
98 Peterson, 2006).

99 Whether the decrease in IGF-1 levels is a direct consequence of exposure to stressors on the  
100 HPS axis or is due to the stress-induced activity of the HPA axis is controversial (Unterman et al.,  
101 1993; Dell et al., 1999; Davis & Peterson, 2006). On the one hand, it is well established that  
102 glucocorticoids initiate and orchestrate the emergency life-history stage within minutes to hours  
103 from the appearance of the stressor in temperate bird species (Breuner, Greenberg & Wingfield,  
104 1998; Wingfield et al., 1998; Romero & Ramage-Healey, 2000; Löhmus, Sundström & Moore,

2006), and we also know that glucocorticoids are interconnected with the somatotropic axis (Dell et al., 1999). For instance, glucocorticoids play a role in the embryonic development of the HPS axis by affecting GH gene expression, IGF-1 transcription (Dell et al., 1999; Bossis & Porter, 2003; Reindl & Sheridan, 2012). Experimental studies have also shown that exogenous glucocorticoids cause lower IGF-1 levels in rats (Gayan-Ramirez et al., 1999), chicken (Leili & Scanes, 1998) and fish (Kajimura et al., 2003; Peterson & Small, 2005). On the other hand, these effects seem to operate only at high glucocorticoid concentrations and/or at a prolonged exposure. For example, although Bossis and Porter (2003) found that glucocorticoids mediate the embryonic development of the HPS axis, hormone treatment for at least 8 hours was necessary to detect a significant increase in GH gene expression. Similarly, while a pharmacological increase in cortisol resulted in a decrease of IGF-1 levels in tilapia *Oreochromis mossambicus* 24-48h post injection (Kajimura et al., 2003), a more moderate, short-term elevation in cortisol did not affect IGF-1 levels in sunshine bass (Davis & Peterson, 2006).

While some of these laboratory, aquacultural and agricultural studies suggest a relationship between stress, glucocorticoids and IGF-1, our knowledge remains very limited about how stressors affect IGF-1 levels in free-living organisms. Importantly, we do not know how the HPA and HPS axes are linked mechanistically. Birds are particularly interesting model systems for studying the IIS, because their metabolism is faster yet their lifespan is longer than similar-sized mammals (Costantini, 2008), and differences in how the IIS is regulated compared to the most studied mammalian models might provide a deeper understanding of the evolution of this pathway (Holmes & Ottinger, 2003; Dantzer & Swanson, 2012). Although the IGF-system has been extensively studied in poultry (reviewed in McMurtry, 1998) almost nothing is known about its regulation in free-living birds (notable exceptions are Lodjak, Mägi & Tilgar, 2014; Lodjak, Tilgar & Mägi, 2016; Lodjak et al., 2017)

While interest in the ecological and evolutionary relevance of IGF-1 has recently increased (Sparkman, Vleck & Bronikowski, 2009; Sparkman et al., 2010; Palacios, Sparkman & Bronikowski, 2012; Lodjak, Mägi & Tilgar, 2014; Reding et al., 2016; Lodjak, Tilgar & Mägi, 2016; Lodjak et al., 2017), to the best of our knowledge no study has directly tested the effects of stressors on the activity of the HPS axis or investigated the mechanistic link between the HPA and HPS axes in any free-living organisms. Therefore, we aimed at answering whether: (1) acute stress affects plasma levels of IGF-1 and whether (2) glucocorticoids directly affect circulating IGF-1 levels. First, we hypothesized that acute stress will affect the activity of the HPS axis; therefore, we predicted that circulating IGF-1 levels will decrease in response to short-term acute stress. Second, to investigate the crosstalk between the HPA and the HPS axes, we experimentally increased corticosterone levels using a minimally invasive technique. We predicted that if the HPS axis

140 receives direct input from glucocorticoids, then increased glucocorticoid levels will down-regulate  
141 IGF-1 levels. Alternatively, if the HPS axis responds to external stressors directly, then we predicted  
142 that short-term elevation of circulating glucocorticoids will not affect IGF-1 levels. To answer these  
143 questions, we studied free-living bearded reedlings *Panurus biarmicus*, a small (~14g), sexually  
144 dimorphic, resident songbird common throughout wetlands of Eurasia.

145

## 146 Material and methods

### 147 1. Study animal and field study

148 We captured 17 wintering free-living bearded reedlings *Panurus biarmicus* (Linnaeus, 1758)  
149 in Hungary at Virágoskúti-halastó (N 47.6518, E 21.3589) between September 2015 and January  
150 2016. We caught the birds with continuously observed mist-nets and subjected them to a  
151 standardized capture-handling-restraint protocol (Wingfield, 1994). The first blood sample (50~100  
152  $\mu$ l) was taken as soon as possible after the bird hit the net (mean handling time: 4:58 minutes;  
153 range: 2-10 minutes). The initial handling times contained one high outlier, inclusion or removal of  
154 this point did not affect our results qualitatively. The handling time was not detectably related to  
155 either corticosterone levels ( $t = 1.276$ ,  $p = 0.223$ ) or IGF-1 levels ( $t = -0.785$ ,  $p = 0.445$ ). The bird  
156 was then placed into an opaque cloth bag and the collection of a subsequent blood sample (50-100  
157  $\mu$ l) was started 15 minutes after the initial capture (completed mean time: 17:51 minutes; range: 15-  
158 19 minutes). We chose to take the second blood sample after 15 minutes because we were interested  
159 in the short-term acute stress-response, and we wanted to minimize the possible downstream effects  
160 of corticosterone on IGF-1 levels. The total volume of the two blood samples was under 140  $\mu$ l that  
161 met the recommendation of Owen (2011). The study was approved by the Institutional Animal Care  
162 and Use Committee at the University of Debrecen (DEMAB/19-6/2015) and the regional  
163 government agency (HBB/17/00870-3/2015).

164

### 165 2. Experimental study

#### 166 Housing protocol

167 Twenty-one wintering bearded reedlings were captured with mist-nets in Hungary at  
168 Hortobágy-Halastó (N 47.6211, E 21.0757) between 18 of October and 16 of November in 2016.  
169 After capture, they were housed in an outdoor aviary at the Botanical Garden of the University of  
170 Debrecen where they were kept for 4 months and acclimated to captivity. Four weeks prior to the  
171 experiment, the birds were transferred to individual cages measuring 25×25×25 cm. All sides of the

172 cages (except for the front) were made of a non-transparent board (OSB); therefore, birds were kept  
173 in visual but not acoustic isolation. Individual cages were separated by a non-transparent removable  
174 divider. Because bearded reedlings are very social, live in flocks and maintain strong pair bonds  
175 throughout the year (Lovász, Fenyvesi & Gyurácz, 2017; Griggio & Hoi, 2011), long-term  
176 individual separation may be perceived as stressful for the birds (as found in other social species,  
177 e.g., Ramage-Healey, Adkins-Regan & Romero, 2003). To avoid such additional stressors, before  
178 the experiment, birds were kept in pairs, by removing the divider between adjacent cages. Food (a  
179 mixture of apple, carrot, quark, cracked dried fish, dried *Gammarus* sp., cracked corn, cracked dry  
180 cat food, a commercial soft food mixture for birds and mealworms) and water were available *ad*  
181 *libitum* at all times.

182

### 183 Experimental design

184 Corticosterone levels were manipulated orally using a minimally invasive technique  
185 described by Breuner et al. (1998), in which corticosterone dissolved in peanut oil was injected into  
186 mealworms *Tenebrio molitor*. We used a randomized block design with two doses of exogenous  
187 corticosterone and a control manipulation for each block.

188 The day before experimental day, we removed the food from the birds 1.5 hour before  
189 sunset and the mobile dividers were inserted into the cages to keep the birds individually. Water was  
190 still available *ad libitum*. The next morning (between 8:00 – 9:00, to avoid daily variation in  
191 hormone levels and to standardize the duration of the food removal), the experimenter quietly  
192 entered the room (the cages were oriented in a way that the birds could not see the door) and gave  
193 one mealworm to the selected bird through a small hole covered by a semi-transparent layer at the  
194 back of the cages, so that the bird could not see the experimenter, but we could observe the birds  
195 and record the time when they consumed the mealworm (mean time of ingestion was 39 seconds).  
196 We paid particular attention to avoid any visual or acoustic contacts with the birds. Fifteen minutes  
197 after the bird consumed the mealworm, the bird was captured through a backdoor at the cages and a  
198 single blood sample (~70µl) was taken as soon as possible. After blood sampling, body mass (to the  
199 nearest 0.1g) of the sampled individuals was also recorded and they were released back to their  
200 cage. The exact times when we entered the room, when the mealworm was given, when the bird ate  
201 the mealworm, when we caught the birds in the cages and when blood sampling was completed  
202 were all recorded. Handling time was defined as the time between when we opened the door of  
203 individual cages and blood sample collected. Total procedural time was defined as the time elapsed  
204 between the experimenter entering the room and when blood sampling was completed. Treatments  
205 were carried out in blocks, so that 3 birds in a block got the mealworms subsequently (with

206 approximately 1 minutes staggering). Two blocks were sampled in a morning. After the treatments  
207 and sampling, the birds received the usual ad libitum bird chow and fresh water and were left  
208 undisturbed for the rest of the day. After we processed all birds, the experiment was repeated one  
209 week later, in which each individual received a different treatment than in the first trial, hence all  
210 birds received 2 different treatments. The treatments for the second trial were randomized again  
211 within blocks and birds were randomly assigned to the blocks.

212

### 213 Mealworm injection

214 Mealworms were injected with 20 $\mu$ l of peanut oil (VWR catalogue number:  
215 ACRO416855000) containing one of the following concentrations of corticosterone (Sigma  
216 catalogue number: NET399250UC): (1) control, no corticosterone; (2) low corticosterone,  
217 0.2mg/ml (4 $\mu$ g corticosterone + 16 $\mu$ l peanut oil); and (3) 0.5mg/ml corticosterone concentration  
218 (10 $\mu$ g corticosterone + 10 $\mu$ l peanut oil). We made a stock solution for every concentration before  
219 we started the experiment. Hereafter we used those stock solution for injection. After thoroughly  
220 vortexing the solution, we injected it into mealworms with a 1ml syringe using a 26G-needle. The  
221 chosen corticosterone concentrations were based on previous studies and were calculated as dose  
222 per body mass. In red-eyed vireos *Vireo olivaceus* (12-16g), plasma corticosterone concentrations  
223 were elevated with a 0.2mg/ml concentration corticosterone solution (which corresponds to 0.28 $\mu$ g  
224 corticosterone per 1g of body mass) (Löhmus, Sundström & Moore, 2006). In Gambel's white  
225 crowned sparrows *Zonotrichia leucophrys gambelii* (25-28g) a low (0.2mg/ml – 0.15 $\mu$ g/g) and a  
226 high (1mg/ml – 0.7 $\mu$ g/g) dose were used, but the low dose did not elevate significantly the plasma  
227 corticosterone levels (Breuner, Greenberg & Wingfield, 1998). Nestling Zebra-finches *Taeniopygia*  
228 *guttata* (6-15 g) received a dose of 0.25mg/ml (1.19 $\mu$ g/g) corticosterone, which resulted in a  
229 significant increase in circulating corticosterone levels (Spencer & Verhulst, 2008). Therefore, our  
230 manipulations correspond to a dose of 0.25 $\mu$ g/g (low) and 0.62 $\mu$ g/g (high).

231

### 232 3. Blood sampling

233 We took blood samples by puncturing the brachial vein with a 26G-needle and collecting  
234 blood in heparinized capillary tubes. Samples were kept on ice until transferring them to the lab (1-  
235 7 hours in the field and max. 1 h in the experiment). Samples were centrifuged at 2200g for 10  
236 minutes and the plasma was removed with a Hamilton syringe. We divided the plasma into 2  
237 aliquots, one for IGF-1 (15 $\mu$ l) and one for corticosterone (15 $\mu$ l). We stored the samples at -20°C  
238 until assayed for corticosterone by radioimmunoassay (RIA) and assayed for IGF-1 by enzyme-  
239 linked immunosorbent assay (ELISA).



240

#### 241 4. Hormone assays

242 Plasma IGF-1 levels were measured in duplicates by a commercial avian ELISA kit  
243 (catalogue: cIGF1ELISA, lot number D00035) from IBT GmbH, Germany. The assay was  
244 developed to measure chicken IGF-1, and the amino acid sequence of IGF-1 is identical in chicken  
245 and in *P. biarmicus* (Á. Z. Lendvai et al. unpublished data), therefore this assay was expected to  
246 perform well in our study species. Serial dilutions of a plasma pool of *P. biarmicus* were parallel of  
247 the standard curve. IGF-1 was separated from its binding proteins using an acidic extraction in  
248 accordance with the manufacturer's instructions. The final concentrations were determined  
249 colourimetrically measuring the absorbance at 450 nm using a Tecan F50 microplate reader. In this  
250 assay, we also included chicken *Gallus gallus* plasma samples as a reference, and the obtained IGF-  
251 1 concentrations for the chicken samples ( $375.2 \pm 69.4$  SE ng/ml) were an order of magnitude  
252 higher than what we had expected based on the literature (30-50 ng/ml, Ballard et al., 1990).  
253 Therefore we measured known concentrations of an international IGF-1 gold standard  
254 (WHO/NIBSC 02/254, a product used in different laboratories to calibrate IGF-1 values – Chanson  
255 et al. 2016) and recalibrated all concentrations against this standard. IGF-1 concentrations of the  
256 recalibrated chicken reference samples (53.0 gn/ml) were similar to published results and were in  
257 agreement with an in-house ELISA developed in our laboratory (Á. Z. Lendvai et al. unpublished  
258 data). Therefore, we used the recalibrated values in our analyses. Note however, that the  
259 recalibration only affects the absolute values reported, since the concentrations obtained originally  
260 would yield the same results, albeit on a different scale. Minimal detection limit was 1.5 ng/ml, and  
261 none of the samples fell below this limit. Intra-assay coefficient of variation was 3.9%, inter-assay  
262 CV was 5.7%.

263 Total corticosterone from plasma samples was quantified through direct radioimmunoassay  
264 (Lendvai, Bókony & Chastel, 2011). We extracted the corticosterone from plasma using diethyl-  
265 ether, and extracts were reconstituted in phosphate-buffered saline. We let the samples incubate  
266 overnight at 4°C. We added ~10K dpm of 3H-Cort (Perkin Elmer Company: Catalogue number:  
267 NET399250UC, lot number: B00025), antiserum (Sigma C8784-100ST, lot number: 092M4784)  
268 and phosphate-buffered saline. We let the solution sit overnight at 4°C. Dextran-coated charcoal  
269 was added to separate corticosterone bound to antibodies. After centrifugation, the radioactivity of  
270 the bound fraction was counted in a liquid scintillation counter (QuantaSmart). All samples were  
271 processed in one assay (intra-assay CV: 3.5%, inter-assay CV: 5.4%).

272

## 273 5. Statistical analyses

274 We analysed our data in R statistical environment, R version 3.3.2 (R Core Team 2017). We  
275 fitted linear mixed models with function ‘lmer’ from package lme4 (Bates et al., 2014; version: 1.1-  
276 13), and we used stepwise backward model selection to find the best fitting model. Degrees of  
277 freedom for linear mixed models were calculated using the Satterthwaite approximation and  
278 corresponding p-values were obtained using the package lmerTest (Kuznetsova, Brockhoff &  
279 Christensen, 2016; version: 2.0-33).

280 To test the effects of handling stress on IGF-1 and corticosterone, we used generalized linear  
281 mixed models with individual as a random intercept. In the initial model, IGF-1 was the dependent  
282 variable, handling (first or second sample) and its two-way interaction with body mass and sex were  
283 the explanatory variables, and ring number (as individual identity) was the random factor. The same  
284 initial model structure was used to model corticosterone levels. We also analysed the relationship  
285 between IGF-1 levels and corticosterone levels in the first sample with a linear model controlling  
286 for body mass. Next, we calculated the stress-induced change in both corticosterone and IGF-1  
287 levels (values from the first sample subtracted from the second samples), and analysed whether the  
288 magnitude of change between these two hormones were related in a linear model. In this analysis,  
289 the dependent variable was the change in IGF-1 levels and the explanatory variable was the change  
290 in corticosterone levels, while controlling for body mass and sex.

291 The experimental data were analysed using linear mixed models. Here, we considered  
292 treatment as a three-level factor (high corticosterone, low corticosterone and control). In the initial  
293 model, IGF-1 or corticosterone was the dependent variable, treatment and its two-way interaction  
294 with sex and body mass were the explanatory variables. The treatment blocks and the weeks of the  
295 experiment were also included as fixed effects. In both models we controlled for the handling time  
296 and total procedural time.

## 297 Results

### 298 *Field samples*

299 The 15 minute capture-restraint stress induced a significant increase in corticosterone levels  
300 (Fig.1a, Table 1), and body mass was positively related with corticosterone levels in the first sample  
301 (Table 1). Sex and the two-way interaction between stress and sex or body mass did not affect  
302 corticosterone levels (Table 1). Handling stress caused a significant decrease in IGF-1 levels  
303 (Fig.1b, Table 2), and IGF-1 levels were higher in males (Table 2). Body mass was not related to  
304 IGF-1 levels in the first sample. Body mass and the two way interaction between stress and sex or  
305 body mass did not affect the IGF-1 levels (Table 2).

306 We did not find a significant relationship between IGF-1 and corticosterone levels in the  
307 first samples ( $t = 0.786$ ,  $p = 0.450$ ). The handling induced change in IGF-1 and in corticosterone ( $t$   
308  $= 0.669$ ,  $p = 0.520$ ) were also unrelated, even after controlling for body mass or sex ( $p$ 's  $> 0.9$ ). One  
309 bird showed an unusual pattern in the corticosterone data, in which corticosterone decreased in  
310 response to handling stress. Removing this data point did not alter any of our conclusions.

311

### 312 *Corticosterone manipulation*

313 The body mass of the captive birds did not change during the two experimental weeks, and  
314 IGF-1 levels, corticosterone levels, block or sex were all unrelated to body mass ( $p$ 's  $> 0.5$ ). The  
315 experimental week or the treatment blocks did not affect corticosterone or IGF-1 levels ( $p$ 's  $> 0.2$ ).

316 Both low and high dose of treatment significantly increased corticosterone levels compared  
317 to the control treatment (Fig.2a, Table 3). Other effects, including sex, mass and the two-way  
318 interaction of treatment with sex and mass, handling time and total procedural time did not  
319 influence corticosterone levels (Table 3). Although the manipulation was successful in creating  
320 differences in circulating corticosterone levels, the treatment did not affect IGF-1 levels (Fig.2b,  
321 Table 4). Furthermore, sex, mass and the two-way interaction of treatment with sex and mass,  
322 handling time and total procedural time did not affect IGF-1 levels during the experiment (Table 4).

323

## 324 Discussion

325 We explored the mechanistic link between the HPA and HPS axes using a free-living  
326 songbird, resulting in two key findings. First, we found that in response to a standardized stressor,  
327 circulating IGF-1 levels decreased in wild bearded reedlings within 15 minutes. To our knowledge,  
328 this is the first study that reports such an effect for any free-living species. Second, we found that  
329 experimentally elevated corticosterone levels did not result in a decrease in IGF-1 levels during the  
330 same time frame as we found in the field. This result suggests that the somatotropic axis may  
331 respond to environmental stimuli independently from the HPA axis and may be part of the adaptive  
332 physiological coping mechanisms used to maintain or restore homeostasis in stressful situations.

333 Increases in plasma corticosterone levels in response to stress have been previously reported  
334 in many species. Our data obtained in bearded reedlings in the field is consistent with these finding,  
335 showing that corticosterone levels increase in response to capture/restraint stress and suggest that  
336 the birds perceived the procedure as stressful. Although many studies collect the stress-induced  
337 blood sample at 30 minutes (Wingfield, Vleck & Moore, 1992; Ramage-Healey & Romero, 2001;  
338 Buehler et al., 2008), we chose to reduce the restraint period to study the effects of short-term acute

339 stress on IGF-1 levels, while minimizing the potential confounding downstream effects of  
340 corticosterone. The effects of glucocorticoids are mainly genomic, which typically act over an hour,  
341 but require at least 15 minutes (reviewed in Haller, Mikics & Makara, 2008). Some short-term  
342 direct effects of corticosterone have been also demonstrated, such as effects on RNA synthesis  
343 (reviewed in Haller, Mikics & Makara, 2008). Therefore, by choosing a shorter restraint period, we  
344 aimed at decreasing the time during which the organism may have been exposed to the  
345 physiological effects of elevated glucocorticoids (Buehler et al., 2008). Although the effects of  
346 stress on IGF-1 levels in free-living organisms have not been reported before, this finding is  
347 consistent with previous studies in captive animals (Farmer et al., 1991; Wilkinson et al., 2006;  
348 Davis & Peterson, 2006; Wirthgen et al., 2017). However, our findings do not support the  
349 conclusion of earlier avian studies (Lodjak, Mägi & Tilgar, 2014; Lodjak, Tilgar & Mägi, 2016;  
350 Lodjak et al., 2017), in which handling time was reported to be unrelated to IGF-1 levels, although  
351 in nestlings. Such effects may be age-specific. For example, gilthead seabream *Sparus aurata*  
352 differed in expression of IGF-1 and IGF-1R mRNA levels during ontogeny (Perrot et al., 1999). In a  
353 study on Korean native ogol chicken, circulating IGF-1 levels gradually increased during the post-  
354 hatching period (Yun et al., 2005). The stress-responsiveness of IGF-1 may also vary with  
355 development, and may explain why Lodjak, Mägi & Tilgar (2014) and Lodjak, Tilgar & Mägi  
356 (2016) did not find that IGF-1 was affected by handling. Furthermore, stress-responsiveness of IGF-  
357 1 may also be species-specific, although we also found that capture-restraint stress caused a  
358 decrease in IGF-1 levels in adult free-living house sparrows *Passer domesticus* (C. I. Vágási et al.  
359 unpublished data). Therefore, we suggest that further studies of IGF-1 levels should take into  
360 account the potentially confounding effect of additional stressors.

361 The decrease in IGF-1 under stress is consistent with the allostatic concept of the stress  
362 response (McEwen & Wingfield, 2003). Under stressful situations, the organism has to re-establish  
363 homeostasis and in order to do so, it has to suppress energetically costly anabolic processes and  
364 reinforce those behavioural and physiological processes that promote immediate survival  
365 (Wingfield et al., 1998). IGF-1 is a prime regulator of anabolic processes and antagonistic of the  
366 catabolic effects of glucocorticoids, therefore the decrease of IGF-1 under acute stress is consistent  
367 with its role as one of the physiological mechanisms responsible for maintaining homeostasis. For  
368 instance, in a previous study in mice, IGF-1 levels decreased markedly in food restricted animals  
369 and the individuals started to lose weight (O'sullivan et al., 1989). However, experimental IGF-1  
370 administration during starvation reduced the rate of weight loss through the inhibition of the  
371 catabolic processes (O'sullivan et al., 1989). The sudden drop of IGF-1 levels in response to the  
372 stressor suggests that this physiological change prepares the animal for the metabolic challenges  
373 faced by slowing down anabolic processes and permitting the catabolic effects of glucocorticoids.

374 In light of these results, we expected that higher glucocorticoid stress responses would be  
375 associated with the largest decrease in IGF-1 levels. However, despite the opposite direction of  
376 change in the two hormones, neither levels in the first sample nor the magnitude of corticosterone  
377 and IGF-1 stress responses were related in the field study at the individual level: birds with the  
378 strongest corticosterone increase were not the ones that decreased their IGF-1 levels the most, and  
379 vice versa. Furthermore, we did not find any relationship between those parameters if we controlled  
380 for body mass. In order to test the relationship between the two hormones more thoroughly, we  
381 carried out an experiment in which we manipulated corticosterone in a minimally invasive manner.

382 Our dietary hormone treatment increased the circulating levels of corticosterone, while  
383 control birds did not show a marked increase in corticosterone levels over the course of the study.  
384 These results suggest that similarly to previous studies (Breuner, Greenberg & Wingfield, 1998;  
385 Löhmus, Sundström & Moore, 2006; Spencer & Verhulst, 2008), our oral hormone treatment was  
386 successful. Corticosterone concentrations after ingesting the mealworm were significantly higher in  
387 both the low and the high dose group compared to the controls, albeit with large individual  
388 variation. Despite this rapid increase in corticosterone levels in the absence of a physical stressor,  
389 IGF-1 levels in our treated birds remained at the level of the controls, with minimal effect sizes;  
390 therefore, we can be confident that the treatment did not affect IGF-1 secretion. Our results are  
391 similar to those reported in the sunshine bass, in which confinement stress for 15 minutes resulted  
392 in a decrease in IGF-1 levels, but the dietary hormone treatment did not affect plasma IGF-1  
393 concentrations (Davis & Peterson, 2006).

394 These results suggest that the HPA and HPS axes are not linked downstream at the endpoint  
395 of these hormonal cascades, but the crosstalk between these pathways happens at the hypothalamic-  
396 pituitary level. We argue that this is the reason behind the discrepancy between the conclusions of  
397 studies using physiological and pharmacological doses (see above). Dexamethasone, a powerful  
398 glucocorticoid agonist, which is known for having a strong negative feedback on the HPA axis has  
399 also been shown to decrease plasma IGF-1 concentration in chickens (Leili & Scanes, 1998), which  
400 supports the notion that integration of the HPA and HPS axes is operating at higher regulatory  
401 levels.

402 According to a recent study performed on great tit nestlings, the relationship between  
403 corticosterone and IGF-1 varies with the nutritional condition of the individuals. Lodjak, Tilgar and  
404 Mägi (2016) found that pre-fledging plasma IGF-1 levels of nestlings in good condition (from  
405 broods that were experimentally reduced) were positively related to feather corticosterone (an  
406 integrated measure of corticosterone over several days during the development), whereas the  
407 association between IGF-1 and feather corticosterone levels was negative in nestlings with lower  
408 nutritional condition (from enlarged broods). In control broods however, there were no association

409 between the two hormones. In our captive study, the birds had *ad libitum* food availability and they  
410 were all in good condition; therefore, one possible explanation for the absence of the relationship  
411 between IGF-1 and corticosterone may be that birds in good condition can afford to tolerate higher  
412 glucocorticoid concentrations without decreasing IGF-1 levels. In line with this possibility,  
413 biomedical studies have shown that IGF-1 diminishes the protein catabolic effects of  
414 glucocorticoids only in normally fed but not in starved subjects (Botfield, Ross & Hinds, 1997).  
415

## 416 Conclusions

417 In this study, we showed that IGF-1 levels decrease in response to stress in a free-living  
418 songbird, and that the magnitude of this response is not related to the glucocorticoid stress response.  
419 Furthermore, an experimental increase in corticosterone did not affect circulating IGF-1 levels.  
420 While glucocorticoids may still have non-linear or permissive effects on IGF-1 regulation, our  
421 results suggest that the HPA and HPS axes are both stress responsive and are not tightly co-  
422 regulated at their downstream endpoints. These results raise the possibility that the interaction  
423 between IGF-1 and corticosterone may modulate the adaptive response of organisms in stressful  
424 situations. Investigations of the relationship between glucocorticoids and fitness remain equivocal,  
425 with some studies showing positive, negative and also no relationship (reviewed in Bonier et al.,  
426 2009). The lack of a general glucocorticoid-fitness relationship has been suggested to be a result of  
427 the flexibility and environmentally context dependent nature of glucocorticoids (Bonier & Martin,  
428 2016). Our results showing that IGF-1 levels are responsive to stress independently from  
429 glucocorticoids suggest that the HPS axis is an autonomous physiological cascade that may be also  
430 involved in the mediation of life history decisions and affect fitness components (Harshman & Zera,  
431 2007; Dantzer & Swanson, 2012; Lewin et al., 2016). IGF-1 is an evolutionary ancient regulatory  
432 hormone with a primary role to provide an organism-wide internal signal about resource  
433 availability, and may alter the function of glucocorticoids. If overall resource availability is high (as  
434 was the case in our captive study), then IGF-1 levels can act as a physiological buffer against the  
435 adverse effects of increased corticosterone levels. However, when the central nervous system  
436 receives input from the environment challenging the organism, it may require the reallocation of  
437 resources, which is reflected in decreased IGF-1 levels. Therefore, circulating IGF-1 levels can be  
438 an important biological indicator of individual internal state and a useful parameter to investigate in  
439 the study of life-history decisions.

440

## 441 Funding

442 Financial support was provided by the Hungarian Scientific Research Fund (OTKA  
443 K113108), the National Development, Research and Innovation Fund (TÉT 15-1-2016-0044), the  
444 European Union and the European Social Fund (EFOP-3.6.1-16-2016-00022), and the Hungarian  
445 Ministry of National Resources - National Talent Program (NTP-EFÖ-P-15-041). During  
446 manuscript preparation, JQO was supported by NSF OIA-1738594 and NIH P20 GM103650.

447

## 448 Acknowledgements

449 We thank Gyula Ölveczki, Janka Péntzes and Anna Anita Rácz for excellent help in the fieldwork  
450 and the experiment. Scott MacDougall-Shackleton and an anonymous reviewer provided  
451 constructive comments on an earlier version of the manuscript. We are grateful for the Hortobágy  
452 National Park to make the work possible.

453

## 454 References

- 455 Baker Michael E. 2003. Evolution of adrenal and sex steroid action in vertebrates: a ligand-based  
456 mechanism for complexity. *BioEssays* 25:396–400. DOI: 10.1002/bies.10252.
- 457 Ballard FJ., Johnson RJ., Owens PC., Francis GL., Upton FM., McMurtry JP., Wallace JC. 1990.  
458 Chicken insulin-like growth factor-I: Amino acid sequence, radioimmunoassay, and plasma  
459 levels between strains and during growth. *General and Comparative Endocrinology* 79:459–  
460 468. DOI: 10.1016/0016-6480(90)90076-X.
- 461 Bates D., Mächler M., Bolker B., Walker S. 2014. Fitting Linear Mixed-Effects Models Using lme4.  
462 - *Journal of Statistical Softwares* 67(1).
- 463 Bijlsma R., Loeschcke V. 2005. Environmental stress, adaptation and evolution: an overview.  
464 *Journal of Evolutionary Biology* 18:744–749. DOI: 10.1111/j.1420-9101.2005.00962.x.

- 465 Bonier F., Martin PR. 2016. How can we estimate natural selection on endocrine traits? Lessons  
466 from evolutionary biology. *Proceedings of the Royal Society B: Biological Sciences*  
467 283:20161887. DOI: 10.1098/rspb.2016.1887.
- 468 Bonier F., Martin PR., Moore IT., Wingfield JC. 2009. Do baseline glucocorticoids predict fitness?  
469 *Trends in Ecology & Evolution* 24:634–642. DOI: 10.1016/j.tree.2009.04.013.
- 470 Bossis I., Porter TE. 2003. Evaluation of glucocorticoid-induced growth hormone gene expression  
471 in chicken embryonic pituitary cells using a novel in situ mRNA quantitation method.  
472 *Molecular and Cellular Endocrinology* 201:13–23. DOI: 10.1016/S0303-7207(03)00006-6.
- 473 Botfield C., Ross RJM., Hinds CJ. 1997. The role of IGFs in catabolism. *Baillière's Clinical*  
474 *Endocrinology and Metabolism* 11:679–697. DOI: 10.1016/S0950-351X(97)80958-5.
- 475 Breuner CW., Greenberg AL., Wingfield JC. 1998. Noninvasive Corticosterone Treatment Rapidly  
476 Increases Activity in Gambel's White-Crowned Sparrows (*Zonotrichia leucophrys*  
477 *gambelii*). *General and Comparative Endocrinology* 111:386–394. DOI:  
478 10.1006/gcen.1998.7128.
- 479 Broughton SJ., Piper MDW., Ikeya T., Bass TM., Jacobson J., Driege Y., Martinez P., Hafen E.,  
480 Withers DJ., Leivers SJ., Partridge L. 2005. Longer lifespan, altered metabolism, and stress  
481 resistance in *Drosophila* from ablation of cells making insulin-like ligands. *Proceedings of*  
482 *the National Academy of Sciences of the United States of America* 102:3105–3110. DOI:  
483 10.1073/pnas.0405775102.
- 484 Buehler DM., Bholra N., Barjaktarov D., Goymann W., Schwabl I., Tieleman BI., Piersma T. 2008.  
485 Constitutive Immune Function Responds More Slowly to Handling Stress than  
486 Corticosterone in a Shorebird. *Physiological and Biochemical Zoology* 81:673–681. DOI:  
487 10.1086/588591.
- 488 Chanson P., Arnoux A., Mayromati M., Brailly-Tabard S., Massart C., Young J., Piketty ML.,  
489 Sourberbielle JC., for the VARIETE Investigators. 2016. Reference Values for IGF-1 Serum



- 490 Concentrations: Comparison of Six Immunoassays. *The Journal of Clinical Endocrinology*  
491 & *Metabolism*. 101:3450-3458. DOI: 10.1210/jc.2016-1257
- 492 Costantini D. 2008. Oxidative stress in ecology and evolution: lessons from avian studies. *Ecology*  
493 *Letters* 11:1238–1251. DOI: 10.1111/j.1461-0248.2008.01246.x.
- 494 Crain DA., Bolten AB., Bjorndal KA., Guillerte Jr. LJ., Gross TS. 1995. Size-Dependent, Sex-  
495 Dependent, and Seasonal Changes in Insulin-like Growth Factor I in the Loggerhead Sea  
496 Turtle (*Caretta caretta*). *General and Comparative Endocrinology* 98:219–226. DOI:  
497 10.1006/gcen.1995.1063.
- 498 Dantzer B., Swanson EM. 2012. Mediation of vertebrate life histories via insulin-like growth factor-  
499 1. *Biological Reviews* 87:414–429. DOI: 10.1111/j.1469-185X.2011.00204.x.
- 500 Davis KB., Peterson BC. 2006. The effect of temperature, stress, and cortisol on plasma IGF-I and  
501 IGFbps in sunshine bass. *General and Comparative Endocrinology* 149:219–225. DOI:  
502 10.1016/j.ygcen.2006.05.009.
- 503 Dell G., Ward A., Shokrai A., Madej A., Engström W. 1999. Regulation of the IGF System by  
504 Glucocorticoids. *Zoological Science* 16:377–385. DOI: 10.2108/zsj.16.377.
- 505 Farmer C., Dubreuil P., Couture Y., Brazeau P., Petitclerc D. 1991. Hormonal changes following an  
506 acute stress in control and somatostatin-immunized pigs. *Domestic Animal Endocrinology*  
507 8:527–536. DOI: 10.1016/0739-7240(91)90022-C.
- 508 Flatt T., Heyland A. 2011. *Mechanisms of Life History Evolution: The Genetics and Physiology of*  
509 *Life History Traits and Trade-Offs*. OUP Oxford.
- 510 Flatt T., Min K-J., D’Alterio C., Villa-Cuesta E., Cumbers J., Lehmann R., Jones DL., Tatar M.  
511 2008. *Drosophila* germ-line modulation of insulin signaling and lifespan. *Proceedings of the*  
512 *National Academy of Sciences* 105:6368–6373. DOI: 10.1073/pnas.0709128105.
- 513 Gayan-Ramirez G., Vanderhoydonc F., Verhoeven G., Decramer M. 1999. Acute Treatment with  
514 Corticosteroids Decreases IGF-1 and IGF-2 Expression in the Rat Diaphragm and

- 515 Gastrocnemius. *American Journal of Respiratory and Critical Care Medicine* 159:283–289.
- 516 DOI: 10.1164/ajrccm.159.1.9803021.
- 517 Griggio M., Hoi H. 2011. An experiment on the function of the long-term pair bond period in the
- 518 socially monogamous bearded reedling. *Animal Behaviour* 82:1329–1325. DOI:
- 519 10.1016/j.anbehav.2011.09.016
- 520 Haller J., Mikics É., Makara GB. 2008. The effects of non-genomic glucocorticoid mechanisms on
- 521 bodily functions and the central neural system. A critical evaluation of findings. *Frontiers in*
- 522 *Neuroendocrinology* 29:273–291. DOI: 10.1016/j.yfrne.2007.10.004.
- 523 Harshman LG., Zera AJ. 2007. The cost of reproduction: the devil in the details. *Trends in Ecology*
- 524 *& Evolution* 22:80–86. DOI: 10.1016/j.tree.2006.10.008.
- 525 Hawlena D., Schmitz OJ. 2010. Physiological Stress as a Fundamental Mechanism Linking
- 526 Predation to Ecosystem Functioning. *The American Naturalist* 176:537–556. DOI:
- 527 10.1086/656495.
- 528 Holmes DJ., Ottinger MA. 2003. Birds as long-lived animal models for the study of aging.
- 529 *Experimental Gerontology* 38:1365–1375. DOI: 10.1016/j.exger.2003.10.018.
- 530 Holzenberger M., Dupont J., Ducos B., Leneuve P., Géloën A., Even PC., Cervera P., Le Bouc Y.
- 531 2003. IGF-1 receptor regulates lifespan and resistance to oxidative stress in mice. *Nature*
- 532 421:182–187. DOI: 10.1038/nature01298.
- 533 Kajimura S., Hirano T., Visitacion N., Moriyama S., Aida K., Grau EG. 2003. Dual mode of cortisol
- 534 action on GH/IGF-I/IGF binding proteins in the tilapia, *Oreochromis mossambicus*. *Journal*
- 535 *of Endocrinology* 178:91–99. DOI: 10.1677/joe.0.1780091.
- 536 Kitaysky AS., Wingfield JC., Piatt JF. 1999. Dynamics of food availability, body condition and
- 537 physiological stress response in breeding Black-legged Kittiwakes. *Functional Ecology*
- 538 13:577–584. DOI: 10.1046/j.1365-2435.1999.00352.x.
- 539 Kunetsova A., Brockhoff PB., Christensen RHB. 2016. lmerTest: Tests in Linear Mixed Effects
- 540 Models. R package version 2.0-33. <https://CRAN.R-project.org/package=lmerTest>

- 541 Leili S., Scanes CG. 1998. The Effects of Glucocorticoids (Dexamethasone) on Insulin-Like  
542 Growth Factor-I, IGF-Binding Proteins, and Growth in Chickens. *Proceedings of the Society*  
543 *for Experimental Biology and Medicine* 218:329–333. DOI: 10.3181/00379727-218-44300.
- 544 Lendvai ÁZ., Bókony V., Chastel O. 2011. Coping with novelty and stress in free-living house  
545 sparrows. *Journal of Experimental Biology* 214:821–828. DOI: 10.1242/jeb.047712.
- 546 Lewin N., Swanson EM., Williams BL., Holekamp KE. 2016. Juvenile concentrations of IGF-1  
547 predict life-history trade-offs in a wild mammal. *Functional Ecology* 31:894-902. DOI:  
548 10.1111/1365-2435.12808.
- 549 Lodjak J., Mägi M., Sild E., Mänd R. 2017. Causal link between insulin-like growth factor 1 and  
550 growth in nestlings of a wild passerine bird. *Functional Ecology* 31:184–191. DOI:  
551 10.1111/1365-2435.12679.
- 552 Lodjak J., Mägi M., Tilgar V. 2014. Insulin-like growth factor 1 and growth rate in nestlings of a  
553 wild passerine bird. *Functional Ecology* 28:159–166. DOI: 10.1111/1365-2435.12164.
- 554 Lodjak J., Tilgar V., Mägi M. 2016. Does the interaction between glucocorticoids and insulin-like  
555 growth factor 1 predict nestling fitness in a wild passerine? *General and Comparative*  
556 *Endocrinology* 225:149–154. DOI: 10.1016/j.ygcen.2015.10.016.
- 557 Lovász L., Fenyvesi L., Gyurácz J. 2017. Contribution to the study of pair formation strategy of the  
558 Bearded Reedling (*Panurus biarmicus*). *North-Western Journal of Zoology* 13:297-302.  
559 Article number: e161609
- 560 Löhmus M., Sundström LF., Moore FR. 2006. Non-invasive corticosterone treatment changes  
561 foraging intensity in red-eyed vireos *Vireo olivaceus*. *Journal of Avian Biology* 37:523–526.  
562 DOI: 10.1111/j.0908-8857.2006.03733.x.
- 563 Martin LB., Liebl AL., Trotter JH., Richards CL., McCoy K., McCoy MW. 2011. Integrator  
564 Networks: Illuminating the Black Box Linking Genotype and Phenotype. *Integrative and*  
565 *Comparative Biology* 51:514–527. DOI: 10.1093/icb/icr049.

- 566 McEwen BS., Wingfield JC. 2003. The concept of allostasis in biology and biomedicine. *Hormones*  
567 *and Behavior* 43:2–15. DOI: 10.1016/S0018-506X(02)00024-7.
- 568 McMurtry JP. 1998. Nutritional and Developmental Roles of Insulin-like Growth Factors in Poultry.  
569 *The Journal of Nutrition* 128:302S–305S. DOI: 10.1093/jn/128.2.302S.
- 570 O’sullivan U., Gluckman P d., Breier B h., Woodall S., Siddiqui R a., McCUTCHEON S n. 1989.  
571 Insulin-like growth factor-1 (igf-1) in mice reduces weight loss during starvation.  
572 *Endocrinology* 125:2793–2794. DOI: 10.1210/endo-125-5-2793.
- 573 Owen JC. 2011. Collecting, processing, and storing avian blood: a review. *Journal of Field*  
574 *Ornithology* 82:339-354. DOI: 10.1111/j.1557-9263.2011.00338.x
- 575 Palacios MG., Sparkman AM., Bronikowski AM. 2012. Corticosterone and pace of life in two life-  
576 history ecotypes of the garter snake *Thamnophis elegans*. *General and Comparative*  
577 *Endocrinology* 175:443–448. DOI: 10.1016/j.ygcen.2011.11.042.
- 578 Pauwels K., Stoks R., De Meester L. 2005. Coping with predator stress: interclonal differences in  
579 induction of heat-shock proteins in the water flea *Daphnia magna*. *Journal of Evolutionary*  
580 *Biology* 18:867–872. DOI: 10.1111/j.1420-9101.2005.00890.x.
- 581 Perrot V., Moiseeva EB., Gozes Y., Chan SJ., Ingleton P., Funkenstein B. 1999. Ontogeny of the  
582 Insulin-like Growth Factor System (IGF-I, IGF-II, and IGF-1R) in Gilthead Seabream  
583 (*Sparus aurata*): Expression and Cellular Localization. *General and Comparative*  
584 *Endocrinology* 116:445–460. DOI: 10.1006/gcen.1999.7337.
- 585 Peterson BC., Small BC. 2005. Effects of exogenous cortisol on the GH/IGF-I/IGFBP network in  
586 channel catfish. *Domestic Animal Endocrinology* 28:391–404. DOI:  
587 10.1016/j.domaniend.2005.01.003.
- 588 Pine MD., Hiney JK., Dearth RK., Bratton GR., Dees WL. 2006. IGF-1 administration to  
589 prepubertal female rats can overcome delayed puberty caused by maternal Pb exposure.  
590 *Reproductive Toxicology* 21:104–109. DOI: 10.1016/j.reprotox.2005.07.003.

- 591 R Core Team 2017. R: The R Project for Statistical Computing. R foundation for Statistical  
592 Computing, Vienna, Austria. <https://www.r-project.org>.
- 593 Reding DM., Addis EA., Palacios MG., Schwartz TS., Bronikowski AM. 2016. Insulin-like  
594 signaling (IIS) responses to temperature, genetic background, and growth variation in garter  
595 snakes with divergent life histories. *General and Comparative Endocrinology* 233:88–99.  
596 DOI: 10.1016/j.ygcen.2016.05.018.
- 597 Reindl KM., Sheridan MA. 2012. Peripheral regulation of the growth hormone-insulin-like growth  
598 factor system in fish and other vertebrates. *Comparative Biochemistry and Physiology Part*  
599 *A: Molecular & Integrative Physiology* 163:231–245. DOI: 10.1016/j.cbpa.2012.08.003.
- 600 Remage-Healey L., Adkins-Regan E., Romero LM. 2003. Behavioral and adrenocortical responses  
601 to mate separation and reunion in the zebra finch. *Hormones and Behavior* 43:108–114.  
602 DOI: 10.1016/S0018-506X(02)00012-0.
- 603 Remage-Healey L., Romero LM. 2001. Corticosterone and insulin interact to regulate glucose and  
604 triglyceride levels during stress in a bird. *American Journal of Physiology - Regulatory,*  
605 *Integrative and Comparative Physiology* 281:R994–R1003.
- 606 Ricklefs RE., Wikelski M. 2002. The physiology/life-history nexus. 17:462–468. DOI:  
607 10.1016/S0169-5347(02)02578-8.
- 608 Roith DL., Scavo L., Butler A. 2001. What is the role of circulating IGF-I? *Trends in*  
609 *Endocrinology & Metabolism* 12:48–52. DOI: 10.1016/S1043-2760(00)00349-0.
- 610 Romero LM., Reed JM., Wingfield JC. 2000. Effects of Weather on Corticosterone Responses in  
611 Wild Free-Living Passerine Birds. *General and Comparative Endocrinology* 118:113–122.  
612 DOI: 10.1006/gcen.1999.7446.
- 613 Romero LM., Remage-Healey L. 2000. Daily and Seasonal Variation in Response to Stress in  
614 Captive Starlings (*Sturnus vulgaris*): Corticosterone. *General and Comparative*  
615 *Endocrinology* 119:52–59. DOI: 10.1006/gcen.2000.7491.

- 616 Sapolsky RM., Romero LM., Munck AU. 2000. How Do Glucocorticoids Influence Stress  
617 Responses? Integrating Permissive, Suppressive, Stimulatory, and Preparative Actions.  
618 *Endocrine Reviews* 21:55–89. DOI: 10.1210/edrv.21.1.0389.
- 619 Sparkman AM., Byars D., Ford NB., Bronikowski AM. 2010. The role of insulin-like growth factor-  
620 1 (IGF-1) in growth and reproduction in female brown house snakes (*Lamprophis*  
621 *fuliginosus*). *General and Comparative Endocrinology* 168:408–414. DOI:  
622 10.1016/j.ygcen.2010.05.006.
- 623 Sparkman AM., Vleck CM., Bronikowski AM. 2009. Evolutionary ecology of endocrine-mediated  
624 life-history variation in the garter snake *Thamnophis elegans*. *Ecology* 90:720–728. DOI:  
625 10.1890/08-0850.1.
- 626 Spencer KA., Verhulst S. 2008. Post-natal exposure to corticosterone affects standard metabolic rate  
627 in the zebra finch (*Taeniopygia guttata*). *General and Comparative Endocrinology* 159:250–  
628 256. DOI: 10.1016/j.ygcen.2008.09.007.
- 629 Stoks R. 2001. Food stress and predator-induced stress shape developmental performance in a  
630 damselfly. *Oecologia* 127:222–229. DOI: 10.1007/s004420000595.
- 631 Swanson EM., Dantzer B. 2014. Insulin-like growth factor-1 is associated with life-history variation  
632 across Mammalia. *Proceedings of the Royal Society of London B* 281:2013-2458. DOI:  
633 10.1098/rspb.2013.2458
- 634 Unterman TG., Jentel JJ., Oehler DT., Lacson RG., Hofert JF. 1993. Effects of glucocorticoids on  
635 circulating levels and hepatic expression of insulin-like growth factor (IGF)-binding proteins  
636 and IGF-I in the adrenalectomized streptozotocin-diabetic rat. *Endocrinology* 133:2531–  
637 2539. DOI: 10.1210/endo.133.6.7694841.
- 638 Wilkinson RJ., Porter M., Woolcott H., Longland R., Carragher JF. 2006. Effects of aquaculture  
639 related stressors and nutritional restriction on circulating growth factors (GH, IGF-I and  
640 IGF-II) in Atlantic salmon and rainbow trout. *Comparative Biochemistry and Physiology*

- 641 *Part A: Molecular & Integrative Physiology* 145:214–224. DOI:  
642 10.1016/j.cbpa.2006.06.010.
- 643 Wingfield JC. 1994. Modulation of the adrenocortical response to stress in birds. *Perspectives in*  
644 *comparative endocrinology*:520–528.
- 645 Wingfield JC., Boonstra R. 2013. Ecological processes and the ecology of stress: the impacts of  
646 abiotic environmental factors. *Functional Ecology* 27:37–44. DOI: 10.1111/1365-  
647 2435.12039.
- 648 Wingfield JC., Maney DL., Breuner CW., Jacobs JD., Lynn S., Ramenofsky M., Richardson RD.  
649 1998. Ecological Bases of Hormone—Behavior Interactions: The “Emergency Life History  
650 Stage.” *American Zoologist* 38:191–206. DOI: 10.1093/icb/38.1.191.
- 651 Wingfield JC., Vleck CM., Moore MC. 1992. Seasonal changes of the adrenocortical response to  
652 stress in birds of the Sonoran desert. *Journal of Experimental Zoology* 264:419–428. DOI:  
653 10.1002/jez.1402640407.
- 654 Wirthgen E., Kunze M., Goumon S., Walz C., Höflich C., Spitschak M., Brenmoehl J., Kanitz E.,  
655 Tuchscherer M., Otten W., Gimsa U., Schön P., Manteuffel C., Tuchscherer A., Pfuhl R.,  
656 Metges CC., Stabenow B., Erdmann S., Schluricke K., Faucitano L., Hoeflich A. 2017.  
657 Interference of stress with the somatotrophic axis in pigs – lights on new biomarkers.  
658 *Scientific Reports* 7:12055. DOI: 10.1038/s41598-017-11521-5.
- 659 Yakar S., Liu J-L., Stannard B., Butler A., Accili D., Sauer B., LeRoith D. 1999. Normal growth and  
660 development in the absence of hepatic insulin-like growth factor I. *Proceedings of the*  
661 *National Academy of Sciences of the United States of America* 96:7324–7329.
- 662 Yun JS., Seo DS., Kim WK., Ko Y. 2005. Expression and relationship of the insulin-like growth  
663 factor system with posthatch growth in the Korean Native Ogot chicken. *Poultry Science*  
664 84:83–90. DOI: 10.1093/ps/84.1.83.
- 665  
666

667 Figure 1: Capture handling stress causes (a) a significant increase in circulating corticosterone  
668 levels (n = 16) and (b) a significant decrease in circulating IGF-1 levels (n = 17) in free-living  
669 bearded reedlings (*Panurus biarmicus*). Squares denote the individual IGF-1 and corticosterone  
670 concentrations, and lines between the squares connect the first and second samples from the same  
671 individual. The dots and arrows beside the individual points represent the mean and standard error  
672 values of corticosterone (a) or IGF-1 (b) levels.

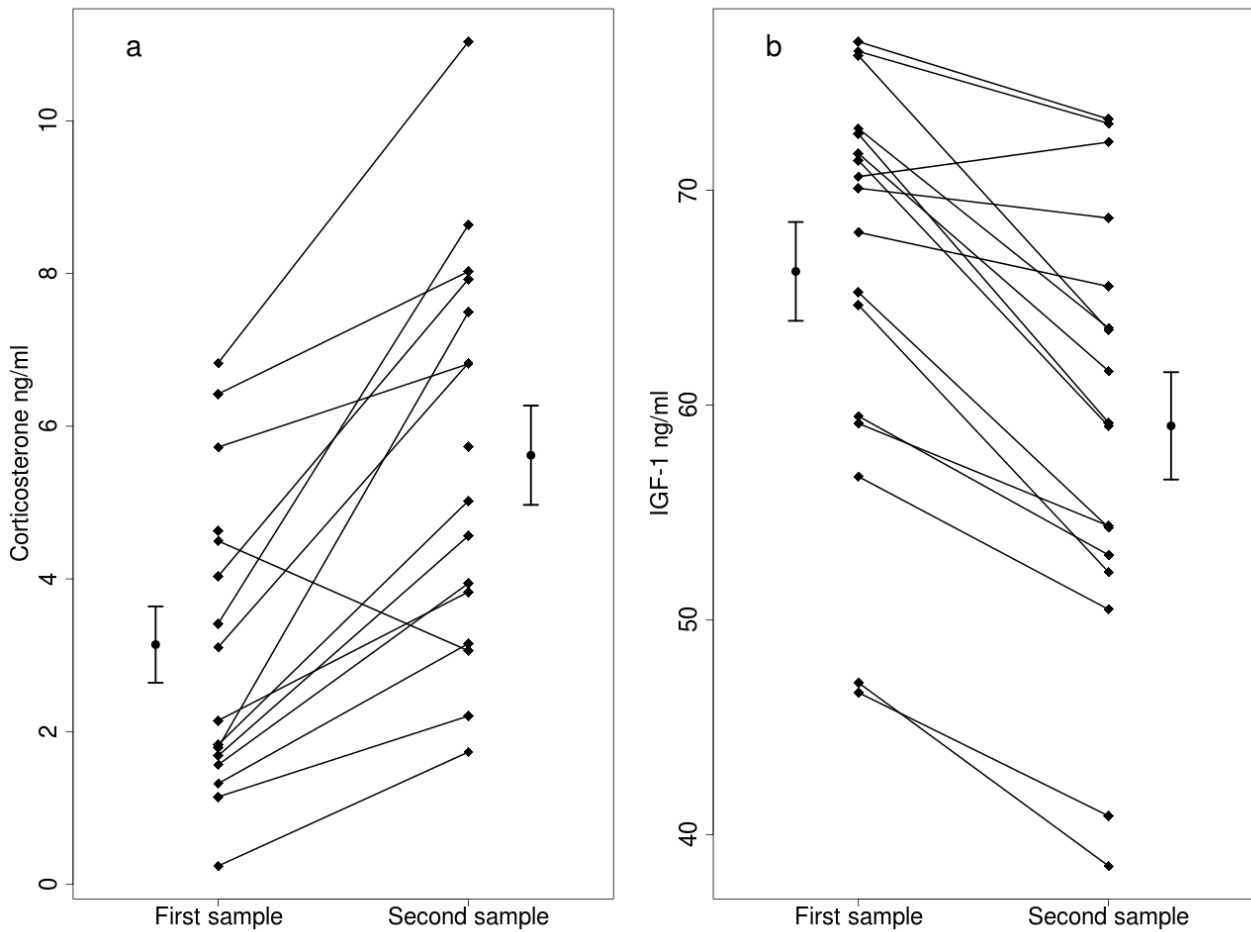



674 Figure 2: Effects of dietary corticosterone treatment on circulating (a) corticosterone (n = 42) and  
675 (b) IGF-1 levels (n = 42). Corticosterone levels were significantly higher in the low corticosterone  
676 (n = 14) and the high corticosterone (n=14) group compared with the control group (n = 14), al-  
677 though the IGF-1 levels did not differ between the treatment groups. We used 21 individuals in the  
678 experiment, and every bird received two different treatments.

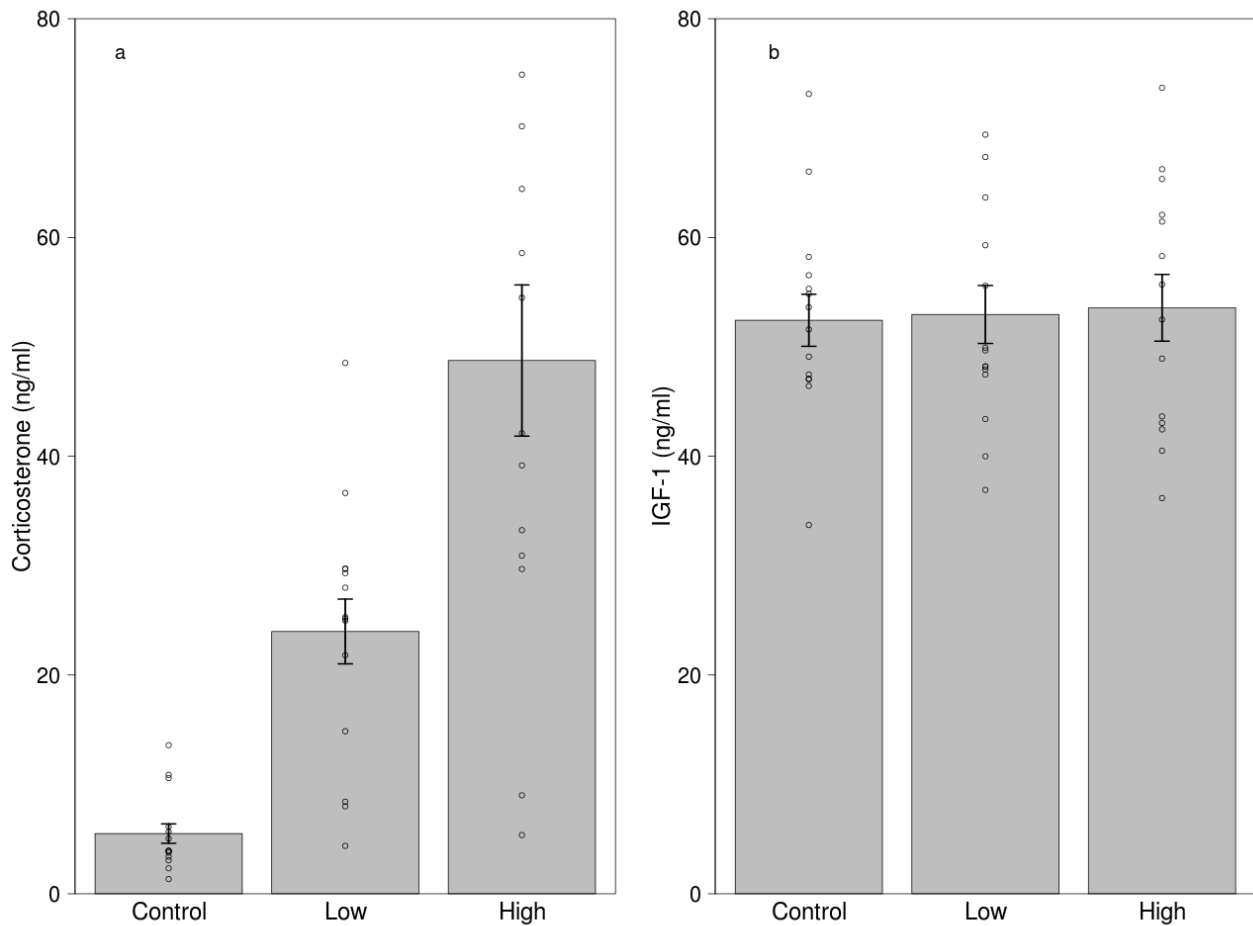

680 Table 1. Parameter estimates of variables affecting circulating corticosterone levels in free-living  
681 bearded reedlings (*Panurus biarmicus*). Results are from the final linear mixed-effects model after  
682 stepwise backward elimination of non-significant effects. The initial model structure was:  
683 Corticosterone ~ Handling × (Sex + Mass). The terms excluded during model selection with the  
684 associated p-values in the model before elimination are shown below the table.

685

|                   | Estimate | Std. Error | df     | t-value | p-value |
|-------------------|----------|------------|--------|---------|---------|
| Intercept         | -22.207  | 7.701      | 10.843 | -2.884  | 0.015   |
| Handling (stress) | 2.619    | 0.570      | 10.664 | 4.593   | <0.001  |
| Mass              | 1.678    | 0.500      | 10.833 | 3.356   | 0.006   |

Terms excluded:

Handling\*Sex p=0.458, Sex p=0.401, Handling\*Mass p=0.096

686

687 Table 2. Parameter estimates of variables affecting circulating corticosterone levels in free-living  
688 bearded reedlings (*Panurus biarmicus*). Results are from the final linear mixed-effects model after  
689 stepwise backward elimination of non-significant effects. The initial model structure was: IGF-1 ~  
690 Handling × (Sex + Mass). The terms excluded during model selection with the associated p-values  
691 in the model before elimination are shown below the table.

692

|                   | Estimate | Std. Error | df     | t-value | p-value |
|-------------------|----------|------------|--------|---------|---------|
| Intercept         | 55.666   | 3.217      | 13.809 | 17.306  | <0.001  |
| Handling (stress) | -6.698   | 1.173      | 13.235 | -5.709  | <0.001  |
| Sex (males)       | 14.181   | 3.880      | 13.001 | 3.655   | 0.003   |

Terms excluded:

Handling\*Mass p=0.644, Handling\*Sex p=0.507, Mass p=0.313

693

694 Table 3. Parameter estimates of variables affecting circulating corticosterone levels after oral  
695 administration of corticosterone in bearded reedlings (*Panurus biarmicus*). Results are from the  
696 final linear mixed-effects model after stepwise backward elimination of non-significant effects. The  
697 initial model structure was: Corticosterone ~ Handling time + Procedural time + Treatment × (Sex +  
698 Mass). The terms excluded during model selection with the associated p-values in the model before  
699 elimination are shown below the table.

700

|                  | Estimate | Std. Error | df     | t-value | p-value |
|------------------|----------|------------|--------|---------|---------|
| Intercept        | 5.660    | 4.550      | 28.750 | 1.244   | 0.223   |
| Treatment (low)  | 18.260   | 6.100      | 33.790 | 2.993   | 0.005   |
| Treatment (high) | 43.100   | 6.100      | 33.790 | 7.006   | <0.001  |

Terms excluded:

Treatment (Low)\*Mass p=0.685, Treatment (High)\*Mass p=0.958,

Treatment (Low)\*Sex p=0.543, Treatment (High)\*Sex p=0.578, Sex p=0.530, Total procedural time p=0.267,

Handling time p=0.338, Mass p=0.249

701

702 Table 4. Parameter estimates of variables affecting circulating corticosterone levels after oral  
703 administration of corticosterone in bearded reedlings (*Panurus biarmicus*). Results are from the  
704 final linear mixed-effects model after stepwise backward elimination of non-significant effects.  
705 Treatment was part of the experimental design, so were kept in the final model, despite being not-  
706 significant. The initial model structure was: IGF-1 ~ Handling time + Procedural time + Treatment  
707 × (Sex + Mass). The terms excluded during model selection with the associated p-values in the  
708 model before elimination are shown below the table.

709

|                  | Estimate | Std. Error | df     | t-value | p-value |
|------------------|----------|------------|--------|---------|---------|
| Intercept        | 52.865   | 2.900      | 5.670  | 18.228  | <0.001  |
| Treatment (low)  | -0.932   | 3.862      | 38.000 | -0.241  | 0.810   |
| Treatment (high) | 0.709    | 3.862      | 38.000 | 0.184   | 0.855   |

Terms excluded:

Handling time p=0.934, Treatment (Low)\*Mass p=0.911, Treatment (High)\*Mass p=0.729, Mass p=0.620,

Total procedural time p=0.502, Treatment (Low)\*Sex p=0.795, Treatment (High)\*Sex p=0.052, Sex p=0.561

710
